# Supplementary material for: Do Physical Activity, Social Cohesion, and Loneliness Mediate the Association Between Time Spent Visiting Green Space and Mental Health?
Source: PubMed Central journal article supplement — Environ Behav. 2017 Nov 14;51(2):144–66. doi: 10.1177/0013916517738563 (PMC6311621; doi:10.1177/0013916517738563), 2017-11-14
Supplement: Table_S1_responses_(1).pdf [file Table_S1_responses_%281%29.pdf]

Supplementary Table S1: Response rates per city

| <b>City</b>    | <b>Invited<br/>n (%)</b> | <b>Willing to participate<br/>n (%)</b> | <b>Participated<br/>n (%)</b> | <b>Method of<br/>respondent<br/>approach</b>         |
|----------------|--------------------------|-----------------------------------------|-------------------------------|------------------------------------------------------|
| Doetinchem     | 10220 (100)              | 904 (8.8)*                              | 861 (8.4)                     | answer card and reminders                            |
| Stoke-on-Trent | 2826 (100)               | 1352 (48.9)                             | 1044 (36.9)                   | premailed and face-to-face approach                  |
| Barcelona      | 2230 (100)               | n.a.                                    | 1045 (46.9)                   | premailed and face-to-face approach                  |
| Kaunas         | 4672 (100)               | n.a.                                    | 997 (21.3)                    | approached by postal mail to fill out questionnaires |
